# Supplementary material for: Hematopoietic stem-cell senescence and myocardial repair - Coronary artery disease genotype/phenotype analysis of post-MI myocardial regeneration response induced by CABG/CD133+ bone marrow hematopoietic stem cell treatment in RCT PERFECT Phase 3
Source: PubMed Central journal article supplement (PMC7339012; doi:10.1016/j.ebiom.2020.102862), 2020-07-04
Supplement: mmc7.pdf [file mmc7.pdf]

**Supplemental data SD1: RT-PCR gene expression analysis and reference gene variation**

**Figure SD1a:** SH2B3 relative expression (normalized to GAPDH) at time point pre-OP correlated to relative left ventricular ejection fraction ( $\Delta$ LVEF) relative longitudinal axis strain ( $\Delta$ LAS) and relative maximum upslope epicardial as well as endocardial at day 180/0 (normalized to pre-OP) for Non-responder and Responder; Mean $\pm$ SEM; \*  $P \leq 0.001$ , \*\*  $P=0.024$  (t-test); \*\*\*  $P=0.015$ , \*\*\*\*  $P=0.038$  (Mann-Whitney Rank Sum test) compared to Non-responder

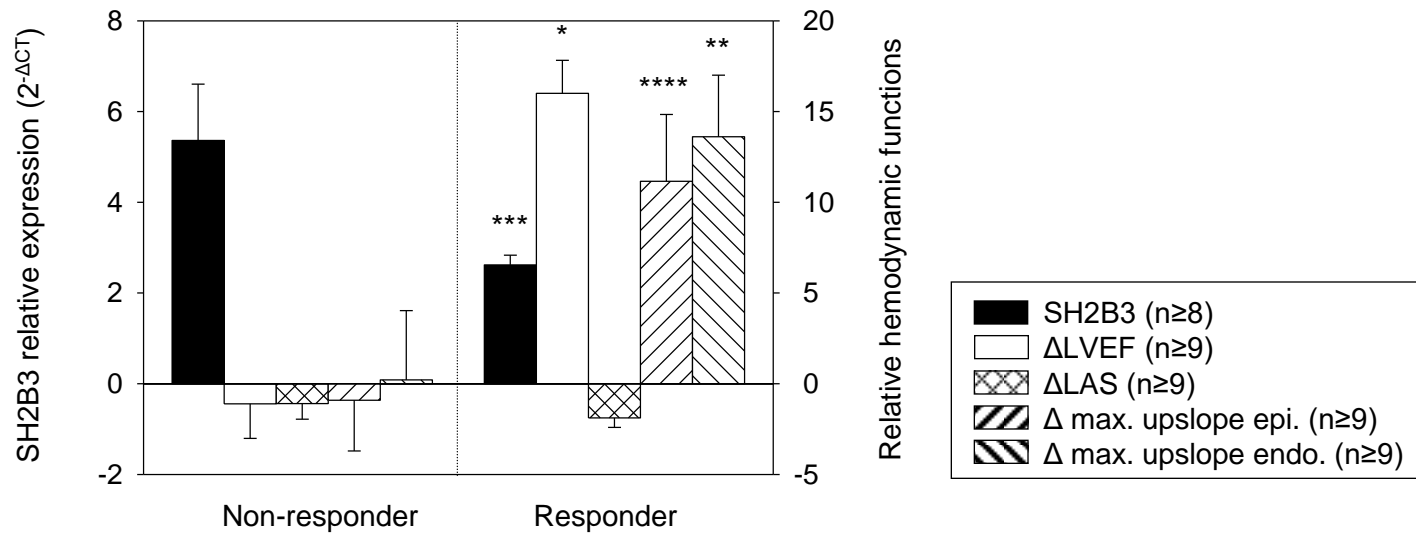

**Figure SD1b:** Correlation between SH2B3 relative expression (normalized to GAPDH) and circulating mononuclear cells (MNC) in peripheral blood for Non-responder and Responder at time point pre-OP; Mean $\pm$ SEM; \*  $P=0.037$  (t-test); \*\*  $P=0.041$ , \*\*\*  $P=0.015$ , \*\*\*\*  $P=0.006$  (Mann-Whitney Rank Sum test) compared to Non-responder

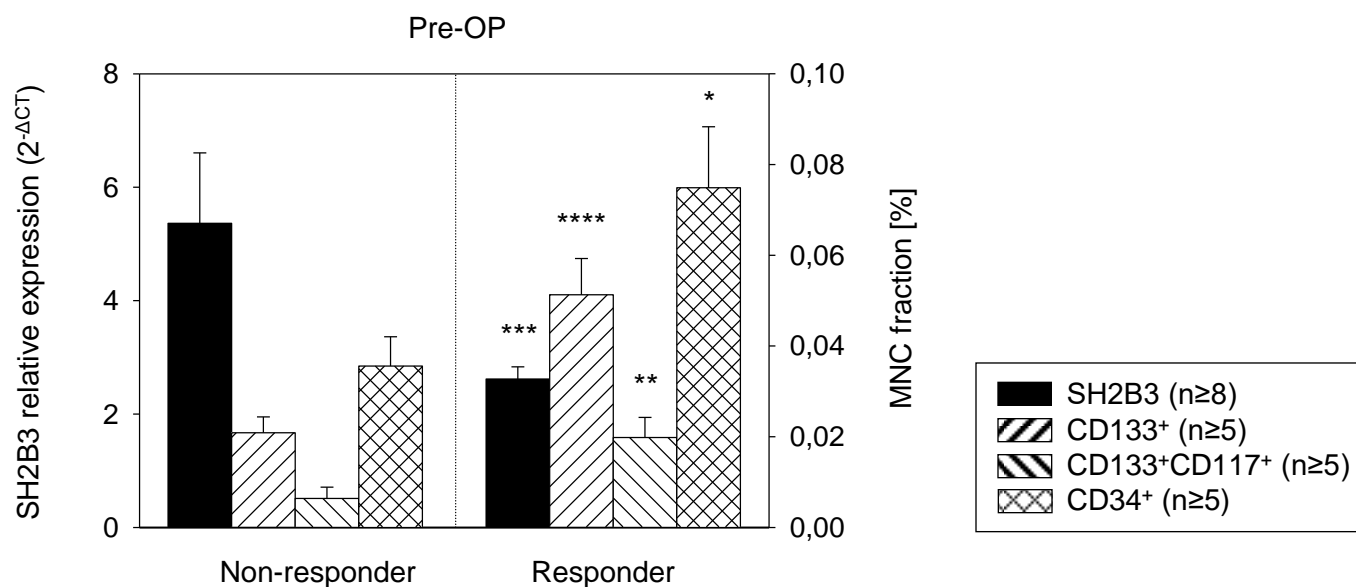

**Figure SD1c:** SH2B3 relative expression (normalized to POLR2A) at time point pre-OP correlated to relative left ventricular ejection fraction ( $\Delta$ LVEF) relative longitudinal axis strain ( $\Delta$ LAS) and relative maximum upslope epicardial as well as endocardial at day 180/0 (normalized to pre-OP) for Non-responder and Responder; Mean $\pm$ SEM; \*  $P \leq 0.001$ , \*\*  $P = 0.024$  (t-test); \*\*\*  $P = 0.038$  (Mann-Whitney Rank Sum test) compared to Non-responder

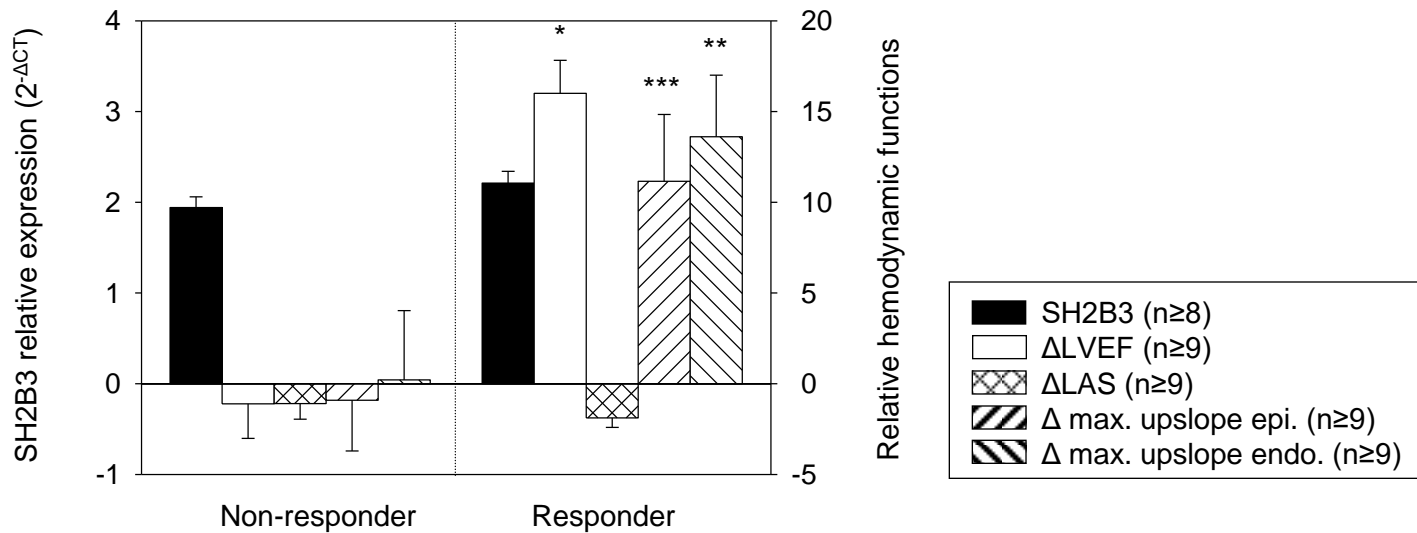

**Figure SD1d:** Correlation between SH2B3 relative expression (normalized to POLR2A) and circulating mononuclear cells (MNC) in peripheral blood for Non-responder and Responder at time point pre-OP; Mean $\pm$ SEM; \*  $P = 0.037$  (t-test); \*\*  $P = 0.041$ , \*\*\*  $P = 0.006$  (Mann-Whitney Rank Sum test) compared to Non-responder

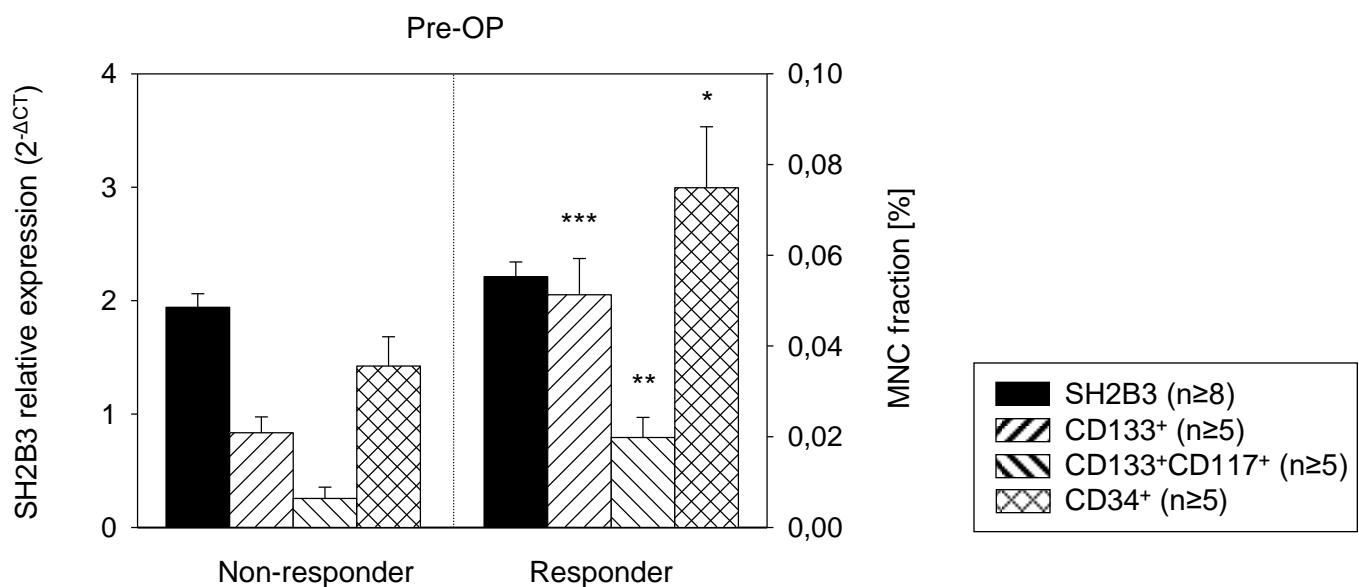

**Figure SD1e:** SH2B3 relative expression (normalized to GAPDH/POLR2A) at time point pre-OP correlated to relative left ventricular ejection fraction ( $\Delta$ LVEF) relative longitudinal axis strain ( $\Delta$ LAS) and relative maximum upslope epicardial as well as endocardial at day 180/0 (normalized to pre-OP) for Non-responder and Responder; Mean $\pm$ SEM; \*  $P \leq 0.001$ , \*\*  $P = 0.024$  (t-test); \*\*\*  $P = 0.038$  (Mann-Whitney Rank Sum test) compared to Non-responder

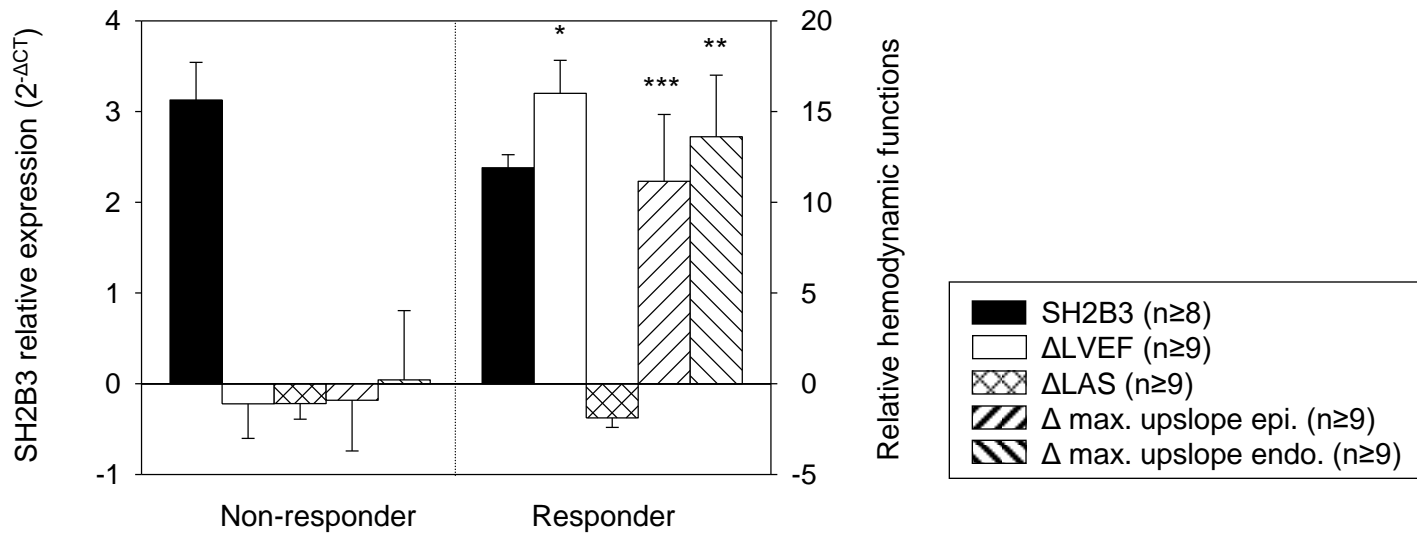

**Figure SD1f:** Correlation between SH2B3 relative expression (normalized to GAPDH/POLR2A) and circulating mononuclear cells (MNC) in peripheral blood for Non-responder and Responder at time point pre-OP; Mean $\pm$ SEM; \*  $P = 0.037$  (t-test); \*\*  $P = 0.041$ , \*\*\*  $P = 0.006$  (Mann-Whitney Rank Sum test) compared to Non-responder

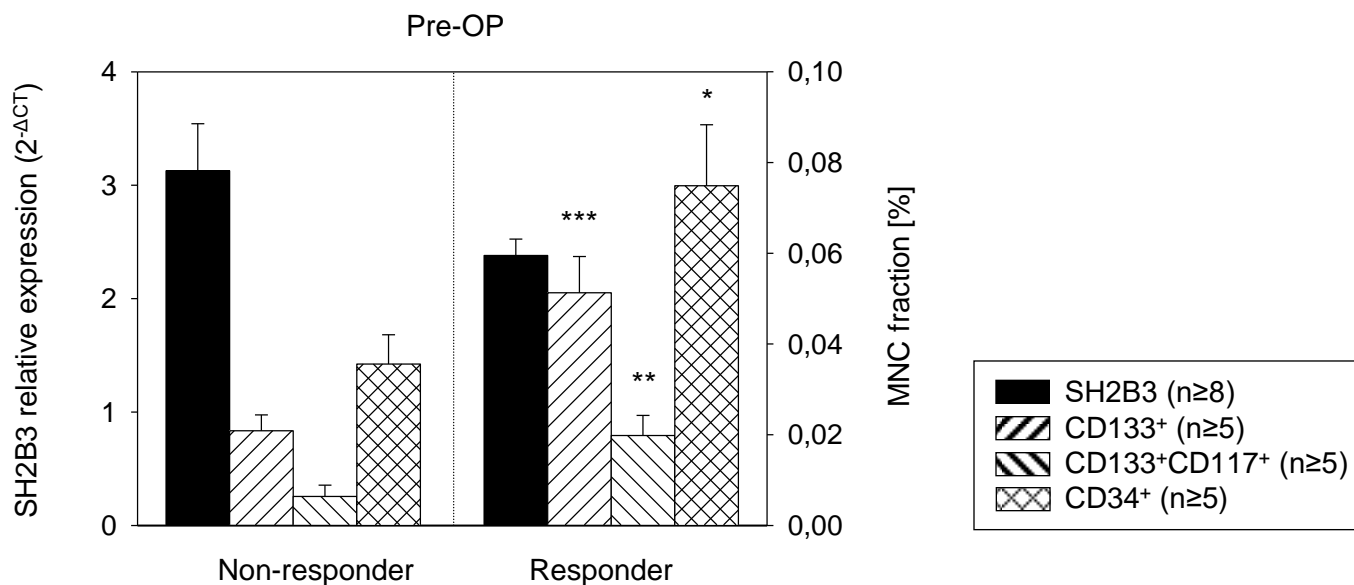

## RT-PCR gene expression and RNAseq variant calling GAPDH and POLR2a/RBP1

### Non-responder

|        | 2- $\Delta$ Cr (Gapdh) | 2- $\Delta$ Cr (Polr2a) | 2- $\Delta$ Cr (both) |
|--------|------------------------|-------------------------|-----------------------|
| RTC099 | 3,287321565            | 1,38938763              | 2,13713919            |
| RTC106 | 12,50194899            | 2,290361109             | 5,351072579           |
| RTC116 | 8,488799152            | 2,084140723             | 4,206168327           |
| RTC119 | 3,085144871            | 2,270275981             | 2,646531749           |
| RTC132 | 2,180831893            | 1,891915283             | 2,031243261           |
| RTC137 | 4,999938059            | 1,975344963             | 3,142706232           |
| RTC140 | 2,95695642             | 1,496807647             | 2,103804882           |
| RTC146 | 5,409452789            | 2,133765437             | 3,397425996           |

|       |             |   |              |                                                                                                    |          |       |
|-------|-------------|---|--------------|----------------------------------------------------------------------------------------------------|----------|-------|
| chr3  | 139240014 A | G | 69,92 PASS   | RTC099<br>RTC137<br>3 RTC140                                                                       | intronic | RBP1  |
| chr12 | 6643927 T   | G | 44,77 PASS   | 1 RTC134                                                                                           | intronic | GAPDH |
| chr12 | 6643991 C   | G | 1096,21 PASS | RTC099<br>RTC101_0<br>RTC106<br>RTC108_0<br>RTC125_0<br>RTC132_0<br>RTC134<br>RTC135_0<br>9 RTC137 | exonic   | GAPDH |
| chr12 | 6644256 T   | A | 146,77 PASS  | RTC111_0<br>2 RTC125_0                                                                             | intronic | GAPDH |
| chr12 | 6644696 T   | G | 99,27 PASS   | RTC108_0<br>RTC111_0<br>RTC125_0<br>4 RTC132_0                                                     | intronic | GAPDH |
| chr12 | 6644722 A   | G | 93,27 PASS   | RTC108_0<br>RTC111_0<br>RTC112_0<br>RTC125_0<br>5 RTC132_0                                         | intronic | GAPDH |
| chr12 | 6644781 T   | C | 124,77 PASS  | RTC108_0<br>RTC111_0<br>RTC112_0<br>4 RTC125_0                                                     | intronic | GAPDH |
| chr12 | 6645565 T   | C | 77,27 PASS   | RTC125_0<br>2 RTC135_0                                                                             | intronic | GAPDH |
| chr12 | 6646299 C   | T | 107,77 PASS  | RTC121_0<br>2 RTC150_0                                                                             | exonic   | GAPDH |
| chr12 | 6646320 T   | C | 1042,27 PASS | RTC106<br>RTC108_0<br>RTC111_0<br>RTC125_0<br>RTC132_0<br>RTC134<br>RTC135_0<br>8 RTC137           | exonic   | GAPDH |
| chr12 | 6647109 T   | C | 1203,64 PASS | RTC106<br>RTC108_0<br>RTC111_0<br>RTC125_0<br>RTC132_0<br>RTC134<br>RTC135_0<br>8 RTC137           | exonic   | GAPDH |
| chr12 | 6647453 G   | T | 149,17 PASS  | RTC111_0<br>RTC125_0<br>RTC132_0<br>RTC134<br>5 RTC135_0                                           | exonic   | GAPDH |
| chr12 | 6647531 T   | C | 29,77 PASS   | 1 RTC116                                                                                           | exonic   | GAPDH |

## Responder

### RT-PCR gene expression and RNAseq variant calling GAPDH and POLR2a/RBP1

| Responder | 2 <sup>-ΔCr</sup> (Gapdh) | 2 <sup>-ΔCr</sup> (Polr2a) | 2 <sup>-ΔCr</sup> (both) |
|-----------|---------------------------|----------------------------|--------------------------|
| RTC110    | 2,739256391               | 3,024732333                | 2,878457464              |
| RTC113    | 1,205470294               | 1,877958347                | 1,504600612              |
| RTC114    | 2,813165625               | 2,188873566                | 2,481464059              |
| RTC115    | 2,194274357               | 2,142232953                | 2,168097515              |
| RTC117    | 1,832204194               | 2,71494396                 | 2,230320988              |
| RTC124    | 2,37027884                | 2,479223275                | 2,424139119              |
| RTC127    | 2,010621437               | 1,444565713                | 1,704251974              |
| RTC130    | 2,177702963               | 1,701066378                | 1,924686284              |
| RTC131    | 2,089402796               | 2,069360217                | 2,079357358              |
| RTC133    | 2,740479523               | 1,926853786                | 2,297934582              |
| RTC139    | 3,534871612               | 2,146324648                | 2,754447689              |
| RTC143    | 3,70166428                | 2,234978812                | 2,876306874              |
| RTC145    | 3,108885923               | 1,844188427                | 2,394445957              |
| RTC136    | 4,142886486               | 3,15525961                 | 3,615505829              |

|       |             |   |              |            |          |       |
|-------|-------------|---|--------------|------------|----------|-------|
| chr3  | 139240014 A | G | 186,44 PASS  | RTC113     |          |       |
| chr3  | 139240018 C | T | 31,77 PASS   | 2RTC114    | intronic | RBP1  |
|       |             |   |              | 1RTC114    | intronic | RBP1  |
| chr12 | 6643927 T   | G | 37,77 PASS   | 1 RTC098_0 | intronic | GAPDH |
|       |             |   |              | RTC095_0   |          |       |
|       |             |   |              | RTC105_0   |          |       |
|       |             |   |              | RTC107_0   |          |       |
|       |             |   |              | RTC117_1   |          |       |
|       |             |   |              | RTC127     |          |       |
|       |             |   |              | RTC131_0   |          |       |
|       |             |   |              | RTC139     |          |       |
| chr12 | 6643991 C   | G | 819,21 PASS  | 9RTC148_0  | exonic   | GAPDH |
|       |             |   |              | RTC098_0   |          |       |
|       |             |   |              | RTC105_0   |          |       |
| chr12 | 6644256 T   | A | 150,36 PASS  | 5RTC148_0  | intronic | GAPDH |
|       |             |   |              | RTC098_0   |          |       |
| chr12 | 6644696 T   | G | 152,77 PASS  | 3RTC117_1  | intronic | GAPDH |
|       |             |   |              | RTC107_0   |          |       |
| chr12 | 6644722 A   | G | 158,1 PASS   | 3RTC117_1  | intronic | GAPDH |
|       |             |   |              | RTC098_0   |          |       |
| chr12 | 6644781 T   | C | 149,37 PASS  | 5RTC148_0  | intronic | GAPDH |
|       |             |   |              | RTC095_0   |          |       |
| chr12 | 6645565 T   | C | 77,65 PASS   | 4RTC117_1  | intronic | GAPDH |
|       |             |   |              | RTC107_0   |          |       |
| chr12 | 6646299 C   | T | 90,27 PASS   | 2RTC148_0  | exonic   | GAPDH |
|       |             |   |              | RTC123_0   |          |       |
|       |             |   |              | RTC095_0   |          |       |
|       |             |   |              | RTC098_0   |          |       |
|       |             |   |              | RTC105_0   |          |       |
|       |             |   |              | RTC107_0   |          |       |
|       |             |   |              | RTC113     |          |       |
|       |             |   |              | RTC115     |          |       |
|       |             |   |              | RTC117_1   |          |       |
|       |             |   |              | RTC139     |          |       |
| chr12 | 6646320 T   | C | 1252,87 PASS | 10RTC148_0 | exonic   | GAPDH |
|       |             |   |              | RTC095_0   |          |       |
|       |             |   |              | RTC098_0   |          |       |
|       |             |   |              | RTC105_0   |          |       |
|       |             |   |              | RTC107_0   |          |       |
|       |             |   |              | RTC113     |          |       |
|       |             |   |              | RTC115     |          |       |
|       |             |   |              | RTC117_1   |          |       |
|       |             |   |              | RTC139     |          |       |
| chr12 | 6647109 T   | C | 1236,77 PASS | 10RTC148_0 | exonic   | GAPDH |
|       |             |   |              | RTC095_0   |          |       |
|       |             |   |              | RTC098_0   |          |       |
|       |             |   |              | RTC107_0   |          |       |
|       |             |   |              | RTC113     |          |       |
|       |             |   |              | RTC115     |          |       |
|       |             |   |              | RTC117_1   |          |       |
|       |             |   |              | RTC145_0   |          |       |
| chr12 | 6647453 G   | T | 126,77 PASS  | 8RTC148_0  | exonic   | GAPDH |
|       |             |   |              | RTC098_0   |          |       |
|       |             |   |              | RTC105_0   |          |       |
|       |             |   |              | RTC107_0   |          |       |
|       |             |   |              | RTC113     |          |       |
|       |             |   |              | RTC115     |          |       |
|       |             |   |              | RTC117_1   |          |       |
|       |             |   |              | RTC145_0   |          |       |
